**Seeing spots: Measuring, quantifying heritability, and assessing fitness consequences of coat pattern traits in a wild population of giraffes (*Giraffa camelopardalis*)**

DEREK E. LEE,<sup>1,2,\*</sup> DOUGLAS R. CAVENER,<sup>2</sup> AND MONICA L. BOND<sup>1,3</sup>

<sup>1</sup> Wild Nature Institute, Concord, New Hampshire, USA

<sup>2</sup> Department of Biology, Pennsylvania State University, University Park, Pennsylvania, USA

<sup>3</sup> Department of Evolutionary Biology and Environmental Studies, University of Zürich, Zürich, Switzerland

\* Correspondent: [derek@wildnatureinstitute.org](mailto:derek@wildnatureinstitute.org)

RH: Giraffe coat pattern traits

**ABSTRACT**

Polymorphic phenotypes of mammalian coat coloration have been important to the study of genetics and evolution, but less is known about the heritability and fitness consequences of individual variation in complex coat pattern traits such as spots and stripes. Giraffe coat markings are highly complex and variable and it has been hypothesized that variation in coat patterns most likely affects fitness by camouflaging neonates against visually hunting predators. We quantified complex coat pattern traits of wild Masai giraffes using image analysis software, determined whether spot pattern traits were heritable, and assessed whether variation in heritable spot pattern traits was related to fitness as measured by juvenile survival. The methods we described could comprise a framework for objective quantification of complex mammal coat pattern traits based on photographic coat pattern data. We demonstrated that some characteristics of giraffe coat spot shape were heritable, as measured by mother-offspring regression. We found significant variation in juvenile survival among

24 phenotypic groups of neonates defined by multivariate clustering based on spot  
 25 measurement variables. We also found significant variation in neonatal survival due to spot  
 26 size and shape covariates. Spot trait variation also may be relevant to other components of  
 27 fitness, such as adult survival or fecundity. These findings will inform investigations into  
 28 developmental and genetic architecture of complex mammal coat patterns and their adaptive  
 29 value.

30 Key words: adaptation, biometrics, coat pattern, heritability, natural selection, phenomics,  
 31 phenotypic selection, photogrammetry, quantitative genetics, remote measurement, visual  
 32 animal biometry

33

34

## INTRODUCTION

35 Complex color patterns such as spots and stripes are found on many animal species and these  
 36 phenotypic traits are hypothesized to play adaptive roles in predator and parasite evasion,  
 37 thermoregulation, and communication (Cott 1940; Caro 2005). Many foundational studies of  
 38 coloration using starkly different color morphs from diverse taxa such as insects (Kettlewell  
 39 1955; Wittkopp *et al.* 2003), mice (Morse 1978; Russell 1985; Bennett and Lamoreux 2003),  
 40 reptiles (Rosenblum *et al.* 2004; Calsbeek *et al.* 2008), fish (Endler 1983; Irion *et al.* 2016),  
 41 and birds (Roulin 2004) demonstrated Mendelian inheritance and natural selection, and  
 42 discovered the genes that cause color morph mutations (Hoekstra 2006; Protas and Patel  
 43 2008; San-Jose and Roulin 2017). Individual variation in a complex color pattern trait of spot  
 44 size was also part of the earliest work on genetics and inheritance (Wright 1917). Measuring  
 45 individual variation in complex color patterns, especially detailed measurements such as  
 46 animal biometrics (Kuhl and Burghardt 2013), can provide novel insight into developmental  
 47 and genetic architecture (Bowen and Dawson 1977; Klingenburg 2010; San-Jose and Roulin  
 48 2017), and the adaptive value of the patterns (Hoekstra 2006; Allen *et al.* 2011), as well as  
 49 benefitting studies of behavior (Lorenz 1937; Whitehead 1990), and population biology  
 50 (Holmberg *et al.* 2009; Lee and Bolger 2017), and the growing field of phenomics (Houle *et*  
 51 *al.* 2010). Some methods to robustly quantify individuals' continuous variation in complex  
 52 color patterns have been developed for general use (Schneider *et al.* 2012; Van Belleghem *et*  
 53 *al.* 2018) and specific taxa such as fishes (Endler 1980; Holmberg *et al.* 2009), butterflies  
 54 (LePoul *et al.* 2014), penguins (Sherley *et al.* 2010), and primates (Allen *et al.* 2015). We see  
 55 a need for more tools and techniques to reliably quantify individual variation in complex coat  
 56 pattern traits in wild populations (Eizirik *et al.* 2010; Willis *et al.* 2013), and studies that  
 57 use quantitative genetics and demography to measure the heritability and adaptive

significance of those traits in wild mammal populations (Kruuk *et al.* 2008; Kaelin *et al.* 2012).

The coat patterns of Masai giraffes (*G. c. tippelskirchii*) are complex and show a high degree of individual variation (Dagg 1968; **Fig 1**), but remain unchanged throughout their lives (Foster 1966). Masai giraffes spots vary in color and shape from those that are nearly round with very smooth edges (low tortuousness), to extremely elliptical with incised or lobate edges (high tortuousness). Giraffe skin pigmentation is uniformly dark grey (Dimond and Montagna 1976), but the spots that make up their coat markings are highly variable in traits such as color, roundness, and perimeter tortuousness, and this variation has been used to classify subspecies (Lydekker 1904), and to reliably identify individuals because patterns do not change with age (Foster 1966; Bolger *et al.* 2012; Dagg 2014). Dagg (1968) first presented evidence from a small zoo population that the shape, number, area, and color of spots in giraffe coat patterns may be heritable, but analysis of spot traits in wild giraffes, and tools for objectively measuring spot characteristics in general have been lacking.

Here we provide an example of measurement, analysis of heritability, and fitness effects, for complex mammalian coat pattern traits using giraffe (*Giraffa camelopardalis*) as the organism of interest. Our purpose in this study was to: 1) demonstrate the use of public domain image analysis software ImageJ (Schneider *et al.* 2012) to extract patterns from image data and quantify multiple aspects of the complex coat patterns of wild Masai giraffes; 2) use quantitative genetics methods (parent-offspring regression) to quantify heritability as the proportion of observed phenotypic variation of a trait that is passed from mother to offspring; and 3) determine whether variation in complex coat pattern traits was related to a measure of fitness and thereby infer the effect of natural selection on giraffe coat patterns (Lande and Arnold 1983; Falconer and Mackay 1996).

The fraction of variability in a phenotypic trait that is explained by additive genetic factors is narrow sense heritability, which can be estimated as the resemblance of the offspring to its parents (Falconer and Mackay 1996; Roff 1997). The mother-offspring regression of traits includes genetic heritability, maternal investment, and shared environmental effects, but even with these confounding effects it is the most appropriate quantitative genetics analytical tool available for our data. We expect very little variation due to environmental effects because the calves were all born in the same area with the same vegetation communities during a relatively short time period of average climate and weather, and there was no spatial segregation according to spot patterns (**Supplementary Material Fig S1**). There may indeed be maternal investment effects, which we could not disentangle from genetics because we lacked siblings in our data.

Fitness of a trait can be assessed in many ways, but because neonatal mortality in mammals is generally higher than any other age class (Lee and Strauss 2016), one common proxy of overall phenotypic fitness is juvenile survival (Paterson *et al.* 1998). It has been hypothesized that giraffe coat patterns evolved to camouflage neonates whose primary defense against predation is concealment (Langman 1977; Mitchell and Skinner 2003); thus the most likely fitness effects from variation in coat patterns should be variation in juvenile survival. Giraffe calves spend much of their time, day and night, hiding in the dappled light of trees and bushes and their ability to match this background should influence detection by visually hunting predators such as lions and hyenas (Endler 1978; Merilaita *et al.* 2017). Background matching, the adaptation of an animal's coloration to mimic its average background and reduce detection by visually hunting predators is a common form of camouflage (Endler 1978; Merilaita *et al.* 2017). Alternative hypotheses about the adaptive value of giraffe coat markings include thermoregulation (Skinner and Smithers 1990), and in this social species with good visual sensory perception (Dagg 2014; VanderWaal *et al.* 2014),

markings could also facilitate individual recognition (Tibbetts and Dale 2007) and kin recognition (Beecher 1982; Tang-Martinez 2001).

## METHODS

As a general overview, our methods were: 1) collect field data in one area of Tanzania as digital images of giraffes to be used for spot pattern and survival analyses; 2) extract patterns from images; 3) quantify giraffe patterns by measuring 11 spot traits; 4) use principal components analysis (PCA) to reduce the dimensionality of the spot traits; 5) use mother-offspring regressions to estimate the narrow sense heritability of the 11 spot traits and the 1st two dimensions of the PCA; 6) use k-means clustering to assign giraffes into 4 phenotypic groups according to their spot pattern traits; 7) use capture-mark-recapture analysis to estimate survival and determine whether there are fitness differences among the phenotypic groups; 8) use capture mark recapture analysis to determine whether there are fitness effects from any particular spot traits.

### *Field Data Collection*

This study used data from individually identified, wild, free-ranging Masai giraffes in a 1700 km<sup>2</sup> sampled area within a 4400 km<sup>2</sup> region of the Tarangire Ecosystem, northern Tanzania, East Africa. We collected data during systematic road transect sampling for photographic capture-mark-recapture (PCMR). We conducted 26 daytime surveys for giraffe PCMR data between January 2012 and February 2016. We sampled giraffes three times per year around 1 February, 1 June, and 1 October near the end of every precipitation season (short rains, long rains, and dry, respectively) by driving a network of fixed-route transects on single-lane dirt tracks in the study area. We surveyed according to Pollock's robust design sampling framework (Pollock 1982; Kendall *et al.* 1995), with three occasions per year. Each sampling occasion was composed of two sampling events during which we surveyed all transects in the study area with only a few days interval between events. Each sampling occasion was

separated by a 4-month interval ( $4.3 \text{ years} \times 3 \text{ occasions year}^{-1} \times 2 \text{ events occasion}^{-1} = 26$  survey events).

During PCMR sampling events, a sample of individuals were encountered and either “sighted” or “resighted” by slowly approaching and photographing the animal’s right side at a perpendicular angle (Canon 40D and Rebel T2i cameras with Canon Ultrasonic IS 100 – 400 mm lens, Canon U.S.A., Inc., One Canon Park, Melville, New York, 11747, USA). We identified individual giraffes using their unique and unchanging coat patterns (Foster 1966; Dagg 2014) with the aid of pattern-recognition software Wild-ID (Bolger *et al.* 2012). We attempted to photograph every giraffe encountered, and recorded sex and age class based on physical characteristics. We assigned giraffes to one of four age classes for each observation based on the species’ life history characteristics and our sampling design: neonate calf (0 – 3 months old), older calf (4 – 11 months old), subadult (1 – 3 years old for females, 1 – 6 years old for males), or adult (> 3 years for females, > 6 years for males) using a suite of physical characteristics (Strauss *et al.* 2015), and size measured with photogrammetry (Lee *et al.* 2016a). In this analysis, we used only adult females and animals first sighted as neonate calves.

All animal work was conducted according to relevant national and international guidelines. This research was carried out with permission from the Tanzania Commission for Science and Technology (COSTECH), Tanzania National Parks (TANAPA), the Tanzania Wildlife Research Institute (TAWIRI). No Institutional Animal Care and Use Committee (IACUC) approval was necessary because animal subjects were observed without disturbance or physical contact of any kind.

### *Quantification of Spot Patterns*

We extracted patterns and analysed spot traits of each animal within the shoulder and rib area by cropping all images to an analysis rectangle that fit horizontally between the anterior edge

of the rear leg and the chest, and vertically between the back and where the skin folded beneath the posterior edge of the foreleg (**Fig 1**). For color trait analysis, we used the Color Histogram procedure of ImageJ (Schneider *et al.* 2012) on full-color images of the analysis rectangle. We extracted coat patterns using ImageJ to convert full-color images of the analysis rectangle to 8-bit greyscale images, then converted to bicolor (black and white) using the Enhance Contrast and Threshold commands (Schneider *et al.* 2012). We quantified 10 spot trait measurements of each animal's extracted coat pattern using Analyze Particles command in ImageJ (Schneider *et al.* 2012). To account for differences in image resolution and animal size (including age-related growth), and to obtain approximately scale-invariant standard images of each animal, we set the measurement unit of each image equal to the number of pixels in the height of the analysis rectangle. Therefore all measurements are in giraffe units (GU), where 1 GU = height of the analysis rectangle (**Fig 1**). We excluded spots cut off by the edge of the analysis rectangle to avoid the influence of incomplete spots, and we also excluded spots whose area was  $<0.00001 \text{ GU}^2$  to eliminate the influence of speckles.

We characterized each animal's spot pattern traits within the analysis rectangle using the following 11 metrics available in ImageJ: number of spots; mean spot size (area); mean spot perimeter; mean angle between the primary axis of an ellipse fit over the spot and the x-axis of the image; mean circularity ( $4\pi \times [\text{Area}] / [\text{Perimeter}]^2$  with a value of 1.0 indicating a perfect circle and smaller values indicating an increasingly elongated shape); mean maximum caliper (the longest distance between any two points along the spot boundary, also known as Feret diameter); mean Feret angle (the angle [0 to 180 degrees] of the maximum caliper); mean aspect ratio (of the spot's fitted ellipse); mean roundness ( $4 \times [\text{Area}] \pi \times [\text{Major axis}]^2$  or the inverse of aspect ratio); mean solidity ( $[\text{Area}] / [\text{Convex area}]$ , also called tortuousness); and mode shade ( $[(65536 \times r) + [256 \times g] + [b]]$  using RGB values from color histogram from full color photos).



We quantified among-individual variation in spot trait values by reporting the mean, SD, and coefficient of variation (CV) of each trait. We also quantified the reliability of our spot pattern trait measurement technique by computing the amount of among-measurement variation for the same animal made on different photos from different dates using a set of 30 animals with >2 images per animal. We performed a principal components analysis (PCA; Hotelling 1933) on the covariance matrix of the 10 spot trait measurements (standardized) to examine the patterns of variation and covariation among the spot measurement data and to compute 2 summary dimensions explaining the 10 measurements. We performed k-means clustering to divide animals into ‘coat pattern phenotypes,’ phenotypic groups based upon their spot trait characteristics (MacQueen 1967). The optimal number of phenotypic groups was determined by the gap statistic (Tibshirani et al. 2001). We performed all statistical operations using R (R Core Development Team 2017).

#### *Heritability of Spot Traits*

The (narrow sense) heritability of a trait (symbolized  $h^2$ ) is the proportion of its total phenotypic variance that is additive, or available for selection to act upon. Parent-offspring (PO) regression is one of the traditional quantitative genetics tools used to test for heritable additive genetic variation (Falconer and Mackay 1996). We understand that PO regression studies cannot distinguish among phenotypic similarity due to genetic heritability, maternal investment, or shared environmental effects. We expect minimal non-random variation due to environmental effects because the calves were all born in the same area with the same vegetation communities during a relatively short time period of average climate and weather with no spatial segregation by coat pattern phenotype (**Supplementary Material Fig S1**). The animal model was not an improvement because we do not know fathers, and we had no known siblings in our dataset, therefore PO regression is the most appropriate tool for our

estimates of heritability, with the caveat that there are potentially environmental and maternal investment effects also present.

We identified 31 mother-calf pairs by observing extended suckling behavior. Wild female giraffes very rarely suckle a calf that is not their own (Pratt and Anderson 1979). We examined all identification photographs for individuals in known mother-calf pairs, and selected the best-quality photograph for each animal based on focus, clarity, perpendicularity to the camera, and unobstructed view of the torso.

We predicted spot pattern traits of a calf would be correlated with those of its mother. We estimated the narrow-sense heritability for each of the 11 spot trait measurements, and the first dimension generated by the PCA. When we examined the 11 individual spot traits, we used the Bonferroni adjustment ( $\alpha$ /number of tests) to account for multiple tests and set our adjusted  $\alpha = 0.0045$ . We performed statistical operations in R (R Core Development Team 2013).

### *Fitness of Spot Patterns from Juvenile Survival*

We assembled encounter histories for 258 calves first observed as neonates for survival analysis. For each calf we selected the best-quality calf-age (age <6 mo) photograph based on focus, clarity, perpendicularity to the camera, and unobstructed view of the torso. We analysed survival using capture-mark-recapture apparent survival models that account for imperfect detectability during surveys (White and Burnham 1999). No capture-mark-recapture analyses except ‘known fate’ models can discriminate between mortality and permanent emigration, therefore when we speak of survival it is technically ‘apparent survival,’ but during the first seasons of life we expected very few calves to emigrate from the study area, and if any did emigrate permanently this effect on apparent survival should be random relative to their spot pattern characteristics.

We estimated age-specific seasonal (4-month seasons) survival (up to 3 years old) according to coat pattern phenotype groups with calves assigned to groups by k-means clustering of their overall spot traits. We compared 3 models, a null model of no group effect, age + group, and age  $\times$  group, to examine whether coat pattern phenotypes affected survival differently at different ages. We also estimated survival as a function of individual covariates of specific spot traits including linear and quadratic relationships of all 11 spot traits and the first two PCA dimensions on juvenile survival to examine whether directional, disruptive, or stabilizing selection was occurring (Lande and Arnold 1983; Falconer and Mackay 1996). To determine at what age specific spot traits had the greatest effect of survival, we examined survival as a function of spot traits during 3 age periods: the first season of life, first year of life, and first three years of life.

We used Program MARK to analyse complete capture-mark-recapture encounter histories of giraffes first sighted as neonates (White and Burnham 1999). We analysed our encounter histories using Pollock's Robust Design models to estimate age-specific survival (Pollock 1982; Kendall *et al.* 1995), and ranked models using AICc following Burnham and Anderson (2002). Weights (W) and likelihood ratio tests as the metrics for the strength of evidence supporting a given model as the best description of the data (Burnham and Anderson 2002). Due to model selection uncertainty, we present model-averaged parameter values and based all inferences on these model-averaged values (Burnham and Anderson 2002). We considered factors to be statistically significant if the 85% confidence interval of the beta coefficient did not include zero (Arnold 2010).

Based on previous analyses for this population (Lee *et al.* 2016a, b), we constrained parameters for survival (S) and temporary emigration ( $\gamma_{\square}$  and  $\gamma_{\square}$ ) to be linear functions of age, and capture and recapture (c and p) were time dependent  $\{(S(A), \gamma_{\square}(A), \gamma_{\square}(A), c(t), p(t))\}$ . Giraffe calf survival does not vary by sex (Lee *et al.* 2016b), so we analysed all calves

together as an additional constraint on the number of parameters estimated. We tested goodness-of-fit in encounter history data using U-CARE (Choquet *et al.* 2009), and we found some evidence for lack of fit ( $\chi^2_{62} = 97$ ,  $P = 0.01$ ), but because the computed  $\hat{c}$  adjustment was  $< 3$  ( $\hat{c} = 1.5$ ), we felt our models fit the data adequately and we did not apply a variance inflation factor (Burnham and Anderson 2002; Choquet *et al.* 2009).

## RESULTS

We were able to extract patterns and quantify 11 spot traits using ImageJ, and found measurements were highly reliable with the low variation in measurements from different photos of the same individual (**Table 1**). From our 31 mother-calf pairs, we found two spot traits, circularity and solidity (tortuousness) (**Fig 2**) had significant PO slope coefficients ( $h^2$ ) between calves and their mothers indicating heritability (**Table 1**). Neither of the first two dimensions from the PCA (see below) had significant PO regression slopes.

The first dimension from the PCA was composed primarily of spot size-related traits (perimeter, maximum caliper, area, and number) such that increasing dimension 1 meant increasing spot size. Dimension 1 explained 40.5% of the variance in the data (**Fig 3**). The second dimension was composed primarily of spot shape traits (aspect ratio, roundness, solidity, and circularity) such that increasing dimension 2 meant increasing roundness and circularity while decreasing dimension 2 meant more tortuous edges and irregular shapes. Dimension 2 explained 24.0% of the variation in the data (**Fig 3**).

Gap statistics indicated 4 phenotypic groups was the optimal number of clusters for k-means clustering, but groups 1 and 2 had a large amount of overlap in PCA variable space (**Fig 4**), so we also defined 3 phenotypic groups by lumping the two overlapping groups. Group 1 had medium-sized circular spots, group 2 had small-sized circular and irregular spots, group 3 had medium-sized irregular spots, and group 4 had large circular and irregular spots (**Figs. 3 & 4**). Our survival analysis of 258 calves divided into 4 phenotypic groups

based on their spot traits indicated that the null model was top-ranked, but AICc weights showed there was some evidence for survival variation among the 4 phenotypic groups (**Table 2**). The 3 phenotypic group model found significant differences in survival according to group (**Table 2**, beta coefficient for lumped groups 1 and 2 = -0.717, 85% CI = -1.235 to -0.199). Model-averaged seasonal apparent survival estimates indicated differences in survival existed among phenotypic groups during the first seasons of life, but those differences were greatly reduced in ages 1 and 2 years old (**Fig 5**).

We found two individual covariates of specific spot traits significantly affected survival during the first season of life (number of spots and aspect ratio; beta<sub>number of spots</sub> = -0.031, 85% CI = -0.052 to -0.009; beta<sub>aspect ratio</sub> = -0.466, 85% CI = -0.827 to -0.105). Both number of spots and aspect ratio were negatively correlated with survival during the first season of life (**Fig 6**). No other trait during any age period significantly affected juvenile survival (all beta coefficient 85% CIs included zero), but model selection uncertainty was high (**Table 3**).

## DISCUSSION

We were able to objectively and reliably quantify coat pattern traits of wild giraffes using image analysis software. We demonstrated that some giraffe coat pattern traits of spot shape appeared to be heritable from mother to calf, and that coat pattern phenotypes defined by spot size and shape differed in fitness as measured by neonatal survival. Individual covariates of spot size and shape significantly affected survival during the first 4 months of life. These results support the hypothesis that giraffe spot patterns are heritable (Dagg 1968), and affect calf survival (Langman 1977; Mitchell and Skinner 2003). Our methods and results add to the toolbox for objective quantification of complex mammalian coat pattern traits, and should be useful for taxonomic or phenotypic classifications based on photographic coat pattern data.

Our analyses highlighted a few aspects of giraffe spots that were most heritable and which seem to have the greatest adaptive significance. We found circularity and solidity, both descriptors of spot shape, to be the most clearly heritable spot trait characteristics. Circularity describes how close the spot is to a perfect circle, and is positively correlated with the trait of roundness and negatively correlated with aspect ratio. Solidity describes how smooth and entire the spot edges are versus tortuous, ruffled, lobed, or incised and is positively correlated with the trait of perimeter. We did not document significant heritability of any size-related spot traits (number of spots, area, perimeter, and maximum caliper), but the first dimension of the PCA was largely composed of size-related traits. These characteristics could form the basis for quantifying spot patterns of giraffes across Africa, and gives field workers a new quantitative lexicon for describing spots. Our mode shade measurement was a crude metric, and color is greatly affected by lighting conditions, so we suggest standardization of photographic methods to control for lighting if color is to be analyzed in future studies.

We found that both size and shape of spots was relevant to fitness measured as juvenile survival. Highest calf survival was observed in the phenotypic group made up of large spots that were either circular or irregular, while lowest survival was in the groups with small and medium-sized circular spots and small irregular spots. Both the survival by phenotype analysis and the individual covariate survival analysis found that larger spots and irregularly shaped spots were correlated with increased survival. It seems likely that these traits enhance the background-matching of giraffe calves in the vegetation of our study area (Ruxton *et al.* 2004; Merilaita *et al.* 2017). The relationships among giraffe spot traits and their effects on fitness are clearly complex, and require additional investigations into adaptive function and genetic architecture.

The possibility remains that spot traits may serve adaptive functions such as thermoregulation (Skinner and Smithers 1990), social communication (VanderWaal *et al.*

2014), or indicators of individual quality (Ljetoff *et al.* 2007), rather than anti-predation camouflage, and thus may demonstrate associations with other components of fitness, such as survivorship in older age classes or fecundity. Individual recognition, kin recognition, and inbreeding avoidance also could play a role in the evolution of spot patterns in giraffes (Beecher 1982; Tibbetts and Dale 2007; Sherman *et al.* 1997). Different aspects of spot traits may also be nonadaptive and serve no function, or spot patterns could be affected by pleiotropic selection on a gene that influences multiple traits (Lamoreux *et al.* 2010).

Photogrammetry to remotely measure animal traits has used geometric approaches that estimate trait sizes using laser range finders and known focal lengths (Lyon 1994; Lee *et al.* 2016a), photographs of the traits together with a predetermined measurement unit (Ireland *et al.* 2006; Willisch *et al.* 2013), or lasers to project equidistant points on animals while they are photographed (Bergeron 2007). We hope the framework we have described using ImageJ to quantify spot characteristics with trait measurements from photographs will prove useful to future efforts at quantifying animal markings as in animal biometry (Kuhl and Burghardt 2013). Trait measurements and cluster analysis such as we performed here could also be useful to classify subspecies, phenotypes, or other groups based on variation in markings, which could advance phenomics of organisms with complex skin or coat patterns (Houle *et al.* 2010).

Masai giraffe spot patterns are particularly diverse among giraffe subspecies (Dagg 1968), and there are spot patterns in northern Tanzania that bear strong similarities to other giraffe subspecies elsewhere in Africa. Two recent genetic analyses of giraffe taxonomy both placed Masai giraffes as their own species (Brown *et al.* 2007; Fennessy *et al.* 2016), but the lack of quantitative tools to objectively analyze coat patterns for taxonomic classification may underlie some of the confusion that currently exists in giraffe systematics (Bercovitch *et*

*al.* 2017). We expect the application of image analysis to giraffe coat patterns will provide a new, robust dataset to address taxonomic and evolutionary hypotheses.

Patterned coats of mammals are hypothesized to be formed by two distinct processes: a spatially oriented developmental mechanism that creates a species-specific pattern of skin cell differentiation and a pigmentation-oriented mechanism that uses information from the pre-established spatial pattern to regulate the synthesis of melanin (Eizirik *et al.* 2010). The giraffe skin has more extensive pigmentation and wider distribution of melanocytes than most other animals (Dimond and Montagna 1976). Coat pattern variation may reflect discrete polymorphisms potentially related to life-history strategies, a continuous signal related to individual quality, or a combination of both. Future work on the genetics of coat patterns will hopefully shed light upon the mechanisms and consequences of coat pattern variation.

#### ACKNOWLEDGEMENTS

This research was carried out with permission from the Tanzania Commission for Science and Technology (COSTECH), Tanzania National Parks (TANAPA), the Tanzania Wildlife Research Institute (TAWIRI), African Wildlife Foundation, and Manyara Ranch Conservancy.

#### FUNDING

Financial support for this work was provided by Sacramento Zoo, Columbus Zoo, Tulsa Zoo, and Cincinnati Zoo.

#### DATA AVAILABILITY

We have deposited the primary data underlying these analyses as follows:

- Sampling locations, original data photos, and spot trait data: Dryad

#### REFERENCES

Åkesson, M., Bensch, S., Hasselquist, D., Tarka, M., and Hansson, B. 2008. Estimating heritabilities and genetic correlations: comparing the ‘animal model’ with parent-



- 378       offspring regression using data from a natural population. PLoS One 3:e1739.
- 379       doi:10.1371/journal.pone.0001739.
- 380   Allen, W. L., Cuthill, I. C., Scott-Samuel, N. E. and Baddeley, R. 2010. Why the leopard got
- 381       its spots: relating pattern development to ecology in felids. Proceedings of the Royal
- 382       Society of London B: Biological Sciences 278:1373–1380.
- 383   Allen, W. L., Higham, J. P. and Allen, W. L. 2015. Assessing the potential information
- 384       content of multicomponent visual signals: a machine learning approach. Proceedings of
- 385       the Royal Society B 282:20142284.
- 386   Arnold, T. W, 2010. Uninformative parameters and model selection using Akaike's
- 387       Information Criterion. Journal of Wildlife Management, 74:1175–1178.
- 388   Bauer, H., *et al.* 2015. Lion (*Panthera leo*) populations are declining rapidly across Africa,
- 389       except in intensively managed areas. Proceedings of the National Academy of Sciences
- 390       112:14894–14899.
- 391   Beecher, M. D. 1982. Signature systems and kin recognition. American Zoologist 22:477–
- 392       490.
- 393   Bennett, D. C., Lamoreux, M. L. 2003. The color loci of mice—a genetic century. Pigment
- 394       Cell Research 16:333–44.
- 395   Bercovitch, F. B., *et al.* 2017. How many species of giraffe are there? Current Biology
- 396       27:R136–R137.
- 397   Bergeron, P., 2007. Parallel lasers for remote measurements of morphological traits. Journal
- 398       of Wildlife Management 71:289–292.
- 399   Bolger, D. T., Morrison, T. A., Vance, B., Lee, D., and Farid, H. 2012. A computer-assisted
- 400       system for photographic mark-recapture analysis. Methods in Ecology and Evolution
- 401       3:813–822.

- 402 Bowen, W. W. and Dawson, W. D. 1977. Genetic analysis of coat color pattern variation in  
403 oldfield mice (*Peromyscus polionotus*) of Western Florida. *Journal of Mammalogy*  
404 58:521–530.
- 405 Brown, D. M., *et al.* 2007. Extensive population genetic structure in the giraffe. *BMC*  
406 *Biology* 5:57.
- 407 Burnham, K. P., and Anderson, D. R. 2002. Model selection and multimodel inference: a  
408 practical information-theoretical approach. Springer-Verlag. New York, New York.
- 409 Caro, T. 2005. The Adaptive Significance of Coloration in Mammals. *BioScience* 55:125–  
410 136.
- 411 Calsbeek, R., Bonneaud, C. and Smith, T. B., 2008. Differential fitness effects of  
412 immunocompetence and neighbourhood density in alternative female lizard morphs.  
413 *Journal of Animal Ecology* 77: 103-109.
- 414 Choquet, R., Lebreton, J.-D., Gimenez, O., Reboulet, A.-M., and Pradel, R. 2009. U-CARE:  
415 Utilities for performing goodness of fit tests and manipulating CAPture-REcapture data.  
416 *Ecography* 32:1071–1074.
- 417 Cott, H. B. 1940. Adaptive coloration in animals. Methuen Publishing. London, United  
418 Kingdom.
- 419 Dagg, A. I. 1968. External features of giraffe. *Mammalia* 32:657–669.
- 420 Dagg, A. I. 2014. Giraffe biology, behavior and conservation. Cambridge University Press.  
421 New York, New York.
- 422 de Villemereuil, P., Gimenez, O., and Doligez, B. 2013. Comparing parent-offspring  
423 regression with frequentist and Bayesian animal models to estimate heritability in wild  
424 populations: a simulation study for Gaussian and binary traits. *Methods in Ecology and*  
425 *Evolution* 4:260–275.

- 426 Dimond, R. L., and Montagna, W. 1976. The skin of the giraffe. *Anatomical Record* 185:63–  
427 75.
- 428 Eizirik, E., *et al.* 2010. Defining and mapping mammalian coat pattern genes: multiple  
429 genomic regions implicated in domestic cat stripes and spots. *Genetics* 184:267–275.
- 430 Endler, J.A. 1978. A predator’s view of animal color patterns. *Evolutionary Biology* 11:319–  
431 364. (doi:10.1007/978-1-4615-6956-5\_5).
- 432 Endler, J. A. 1980. Natural selection on color patterns in *Poecilia reticulata*. *Evolution* 34:76-  
433 91.
- 434 Endler, J. A. 1983. Natural and sexual selection on color patterns in poeciliid fishes.  
435 *Environmental Biology of Fishes* 9:173–190.
- 436 Falconer, D. S., and Mackay, T. F. C. 1996. Introduction to quantitative genetics. 4<sup>th</sup> edition.  
437 Pearson/Prentice Hall. New York, New York.
- 438 Fennessy, J., *et al.* 2016. Multi-locus analyses reveal four giraffe species instead of one.  
439 *Current Biology* 26:2543–2549.
- 440 Foster, J. B. 1966. The giraffe of Nairobi National Park: home range, sex ratios, the herd, and  
441 food. *African Journal of Ecology* 4:139–148.
- 442 Garvie, M. R., and Trenchea, C. 2014. A three level finite element approximation of a pattern  
443 formation model in developmental biology. *Numerische Mathematik* 127:397–422.
- 444 Hoekstra, H. E. 2006. Genetics, development and evolution of adaptive pigmentation in  
445 vertebrates. *Heredity* 97:222–234.
- 446 Holmberg, J., Norman, B., and Arzoumanian, Z. 2009. Estimating population size, structure,  
447 and residency time for whale sharks *Rhincodon typus* through collaborative photo-  
448 identification. *Endangered Species Research* 7:39-53.
- 449 Hotelling, H. 1933. Analysis of a complex of statistical variables into principal components.  
450 *Journal of Educational Psychology* 25: 417–441.

- 451 Houle, D., Govindaraju, D. R., and Omholt, S., 2010. Phenomics: the next challenge. *Nature*
- 452 *reviews genetics* 11:855–866.
- 453 Ireland, D., Garrott, R. A., Rotella, J., Banfield, J. 2006. Development and application of a
- 454 mass-estimation method for Weddell seals. *Marine Mammal Science* 22:361–378.
- 455 Irion, U., Singh, A. P., and Nüsslein-Volhard, C. 2016. The developmental genetics of
- 456 vertebrate color pattern formation: lessons from zebrafish. In *Current topics in*
- 457 *developmental biology* (Vol. 117, pp. 141–169). Academic Press.
- 458 Kaelin, C. B., Xu, X., Hong, L. Z., David, V. A., McGowan, K. A., Schmidt-Küntzel, A.,
- 459 Roelke, M. E., Pino, J., Pontius, J., Cooper, G. M. and Manuel, H. 2012. Specifying and
- 460 sustaining pigmentation patterns in domestic and wild cats. *Science* 337:1536–1541.
- 461 Kaufman, L., and Rousseeuw, P. J. 2009. Finding groups in data: an introduction to cluster
- 462 analysis. John Wiley & Sons. Hoboken, New Jersey.
- 463 Kelsh, R. N. 2004. Genetics and evolution of pigment patterns in fish. *Pigment Cell*
- 464 *Melanoma Research* 17:326–336.
- 465 Kendall, W. L., Pollock, K. H., and Brownie, C. 1995. A likelihood based approach to
- 466 capture–recapture estimation of demographic parameters under the robust design.
- 467 *Biometrics* 51:293–308.
- 468 Kettlewell, H. B. D. 1955. Selection experiments on industrial malanism in the Lepidoptera.
- 469 *Heredity* 9:323–342. (doi:10.1038/hdy.1955.36)
- 470 Klingenberg, C. P. 2010. Evolution and development of shape: integrating quantitative
- 471 approaches. *Nature* 11:623–635.
- 472 Kruuk, L. E., Slate, J., and Wilson, A. J. 2008. New answers for old questions: the
- 473 evolutionary quantitative genetics of wild animal populations. *Annual Review of*
- 474 *Ecology, Evolution, and Systematics* 39:525–548.

- 475 K hl, H.S. and Burghardt, T. 2013. Animal biometrics: quantifying and detecting phenotypic  
476 appearance. *Trends in ecology & evolution* 28:432-441.
- 477 Lamoreux, M. L., Delmas, V., Larue, L., and Bennett, D. 2010. The colors of mice: a model  
478 genetic network. John Wiley & Sons. Hoboken, New Jersey.
- 479 Lande, R., and Arnold, S. J. 1983. The measurement of selection on correlated characters.  
480 *Evolution* 37:1210–1226.
- 481 Langman, V. A. 1977. Cow–calf Relationships in Giraffe (*Giraffa camelopardalis giraffa*).  
482 *Ethology* 43:264–286.
- 483 Lee, D. E. and Bolger, D. T. 2017. Movements and source–sink dynamics of a Masai giraffe  
484 metapopulation. *Population Ecology* 59:157-168.
- 485 Lee, D. E., Bond, M. L., Kissui, B. M., Kiwango, Y. A., and Bolger, D. T. 2016a. Spatial  
486 variation in giraffe demography: a test of 2 paradigms. *Journal of Mammalogy* 97:1015–  
487 1025.
- 488 Lee, D. E., Kissui, B. M., Kiwango, Y. A., and Bond, M. L. 2016b. Migratory herds of  
489 wildebeests and zebras indirectly affect calf survival of giraffes. *Ecology and Evolution*  
490 6:8402–8411. doi:10.1002/ece3.2561.
- 491 Lee, D. E., and Strauss, M. K. L. 2016. Giraffe demography and population ecology.  
492 Reference module in earth systems and environmental sciences. Elsevier. Amsterdam,  
493 Netherlands.
- 494 Le Poul, Y., Whibley, A., Chouteau, M., Prunier, F., Llaurens, V. & Joron, M. (2014).  
495 Evolution of dominance mechanisms at a butterfly mimicry supergene. *Nature*  
496 *Communications* 5:1–8.
- 497 Lichtenfeld, L. L. 2005. Our shared kingdom at risk: Human–lion relationships in the 21<sup>st</sup>  
498 century. Ph.D. dissertation, Yale University, New Haven, Connecticut.
- 499 Lorenz, K. 1937. Imprinting. *The Auk* 54:245–273.

- 500 Ljetoff, M., Folstad, I., Skarstein, F., and Yoccoz, N. G. 2007. Zebra stripes as an amplifier  
501 of individual quality? *Annales Zoologici Fennici* 44: 368–376.
- 502 Lydekker, R. 1904. On the Subspecies of *Giraffa camelopardalis*. *Proceedings of the*  
503 *Zoological Society of London* 74:202–229.
- 504 Lynch, M., and Walsh, B. 1998. *Genetics and analysis of quantitative traits*. Sinauer.  
505 Sunderland, Massachusetts.
- 506 Lyon, B. E. 1994. A technique for measuring precocial chicks from photographs. *The Condor*  
507 86:805–809.
- 508 MacQueen, J. 1967. Some methods for classification and analysis of multivariate  
509 observations. Pp. 281–297 in: *Proceedings of 5th Berkeley Symposium on Mathematical*  
510 *Statistics and Probability*, University of California Press, Berkeley.
- 511 Maini, P. K. 2004. Using mathematical models to help understand biological pattern  
512 formation. *Comptes Rendus Biologies* 327:225–234.
- 513 Merilaita, S., Scott-Samuel, N. E., and Cuthill, I.C. 2017. How camouflage works.  
514 *Philosophical Transactions of the Royal Society B* 372:20160341.  
515 (doi:10.1098/rstb.2016.0341)
- 516 Mills, M. G., and Patterson, L. B. 2009. Not just black and white: pigment pattern  
517 development and evolution in vertebrates. *Seminars in Cell and Developmental Biology*  
518 20:72–81.
- 519 Mitchell, G., and Skinner, J. D. 2003. On the origin, evolution and phylogeny of giraffes  
520 *Giraffa camelopardalis*. *Transactions of the Royal Society of South Africa* 58:51–73.
- 521 Morse, H. 1978. *Origins of Inbred Mice*. Academic: New York.
- 522 Murray, J. D. 1981. On pattern formation mechanisms for lepidopteran wing patterns and  
523 mammalian coat markings. *Philosophical Transactions of the Royal Society B: Biological*  
524 *Sciences* 295:473–496.

- 525 Orr, H. A. 2009. Fitness and its role in evolutionary genetics. *Nature Reviews Genetics*
- 526 10:531.
- 527 Packer, C., Brink, H., Kissui, B. M., Maliti, H., Kushnir, H., and Caro, T. 2011. Effects of
- 528 trophy hunting on lion and leopard populations in Tanzania. *Conservation Biology*
- 529 25:142–153.
- 530 Paterson, S., Wilson, K., and Pemberton, J. M. 1998. Major histocompatibility complex
- 531 variation associated with juvenile survival and parasite resistance in a large unmanaged
- 532 ungulate population (*Ovis aries* L.). *Proceedings of the National Academy of Sciences*
- 533 95:3714–3719.
- 534 Pollock, K. H. 1982. A capture–recapture design robust to unequal probability of capture.
- 535 *Journal of Wildlife Management* 46:752–757.
- 536 Pratt, D. M., and Anderson, V. H. 1979. Giraffe Cow–Calf Relationships and Social
- 537 Development of the Calf in the Serengeti. *Ethology* 51:233–251.
- 538 Protas, M. E. and Patel, N. H. 2008. Evolution of coloration patterns. *Annual review of cell*
- 539 *and developmental biology* 24:425–446.
- 540 R Core Development Team. 2017. R: a language and environment for statistical computing.
- 541 R Foundation for Statistical Computing. Vienna, Austria.
- 542 Roff, D. A. 1997. *Evolutionary Quantitative Genetics*. New York: Chapman and Hall.
- 543 Roulin, A. 2004. The evolution, maintenance and adaptive function of genetic colour
- 544 polymorphism in birds. *Biological Reviews* 79:815–848.
- 545 (doi:10.1017/s1464793104006487).
- 546 Rosenblum, E. B., Hoekstra, H. E., Nachman, M. W. 2004. Adaptive reptile color variation
- 547 and the evolution of the *Mc1r* gene. *Evolution* 58:1794–808
- 548 Russell, E. S. 1985. A history of mouse genetics. *Annual Review of Genetics* 19:1–28.

- 549 Ruxton, G. D., Sherratt, T. N., and Speed, M. P. 2004. Avoiding attack. Oxford, UK: Oxford  
550 University Press.
- 551 San-Jose, L. M. and Roulin, A. 2017. Genomics of coloration in natural animal populations.  
552 Philosophical Transactions of the Royal Society B, 372:20160337.
- 553 Schneider, C. A., Rasband, W. S., and Eliceiri, K. W. 2012. NIH Image to ImageJ: 25 years  
554 of image analysis. Nature Methods doi:10.1038/nmeth.2089[C].
- 555 Sherley, R. B., Burghardt, T., Barham, P. J., Campbell, N. and Cuthill, I.C. 2010. Spotting  
556 the difference: towards fully-automated population monitoring of African penguins  
557 *Spheniscus demersus*. Endangered Species Research 11:101-111.
- 558 Sherman, P. W., Reeve, H. K., and Pfennig, D. W. 1997. Recognition systems. Pp. 69–96 in  
559 Behavioural ecology: an evolutionary approach (J. R. Krebs and N. B. Davies, eds.).  
560 Blackwell Scientific. Oxford, United Kingdom.
- 561 Sikes, R. S. and Animal Care and Use Committee of the American Society of Mammalogists,  
562 2016. 2016 Guidelines of the American Society of Mammalogists for the use of wild  
563 mammals in research and education. Journal of Mammalogy 97:663–688.
- 564 Skinner, J. D., and Smithers, R. H. N. 1990. The mammals of the Southern African Sub-  
565 region. 2nd ed. University of Pretoria. Pretoria, South Africa.
- 566 Strauss, M. K., Kilewo, M., Rentsch, D., and Packer, C. 2015. Food supply and poaching  
567 limit giraffe abundance in the Serengeti. Population Ecology 57:505–516.
- 568 Tang-Martinez, Z. 2001. The mechanisms of kin discrimination and the evolution of kin  
569 recognition in vertebrates: a critical re-evaluation. Behavioural Processes 53:21–40.
- 570 Tibbetts, E. A. and Dale, J. 2007. Individual recognition: it is good to be different. Trends in  
571 Ecology and Evolution 22:529–537.



- 572 Tibshirani, R., Walther, G., and Hastie, T. 2001. Estimating the number of clusters in a data  
573 set via the gap statistic. *Journal of the Royal Statistical Society: Series B (Statistical*  
574 *Methodology)* **63**: 411–423.
- 575 Van Belleghem, S. M., Papa, R., Ortiz-Zuazaga, H., Hendrickx, F., Jiggins, C. D.,  
576 McMillan, W. O., and Counterman, B. A. 2018. patternize: An R package for quantifying  
577 colour pattern variation. *Methods in Ecology and Evolution*, 9:390-398.
- 578 VanderWaal, K. L., Wang, H., McCowan, B., Fushing, H., and Isbell, L. A. 2014. Multilevel  
579 social organization and space use in reticulated giraffe (*Giraffa camelopardalis*).  
580 *Behavioral Ecology* 25:17–26.
- 581 White, G. C., and Burnham, K. P. 1999. Program MARK: survival estimation from  
582 populations of marked animals. *Bird Study* 46(Supplement):120–138.
- 583 Whitehead, H. 1990. Computer assisted individual identification of sperm whale flukes.  
584 *Reports of the International Whaling Commission, Special Issue* 12:71–77.
- 585 Willis, C. S., Marreros, N., and Neuhaus, P. 2013. Long-distance photogrammetric trait  
586 estimation in free-ranging animals: A new approach. *Mammalian Biology* 78:351–355.
- 587 Wilson, A. J., *et al.* 2010. An ecologist's guide to the animal model. *Journal of Animal*  
588 *Ecology* 79:13–26.
- 589 Wittkopp, P. J., Williams, B. L., Selegue, J. E., Carroll, S. B. 2003. *Drosophila* pigmentation  
590 evolution: divergent genotypes underlying convergent phenotypes. *Proceedings of the*  
591 *National Academy of Sciences USA* 100:1808–13.
- 592 Wright, S. 1917. Color inheritance in mammals –III. The rat. *Journal of Heredity* 8:426–430.

# FIGURE CAPTIONS

- 594 **Fig 1.** Representative images of spot patterns of mother-calf pairs of Masai giraffes (*Giraffa*  
595 *camelopardalis tippelskirchii*) from the Tarangire ecosystem, Tanzania used in this study.

The blue rectangle shows the area analysed using ImageJ to characterize spot pattern traits.

**Fig 2.** Representative spot outlines from Masai giraffes in northern Tanzania and their corresponding circularity and solidity values. Ranges of spot trait values from 213 calves are given in parentheses.

**Fig 3.** Contributions of 10 trait measurement variables to the first 2 dimensions of the principal components analysis of giraffe spots. The first dimension (Dim1) was composed primarily of spot size-related traits (perimeter, maximum caliper, area, and number of spots), the second dimension (Dim2) was composed primarily of spot shape traits (aspect ratio, roundness, solidity, and circularity).

**Fig 4.** Results from k-means cluster analysis of giraffe spot patterns to define phenotypic groups. Left is gap statistic for different numbers of groups. Right is 4 clusters mapped in PCA space.

**Fig 5.** Model-averaged seasonal (4 months) apparent survival estimates for coat pattern phenotypic groups of giraffes defined by k-means clustering of their spot pattern traits. There was evidence for significant differences in survival among phenotypic groups during the younger ages, but those differences were greatly reduced as the animals approached adulthood (age 9 – 11 seasons). Error bars are  $\pm 1$  SE.

**Fig 6.** Survival of neonatal giraffes during their first 4-months of life was negatively correlated with number of spots (a) and aspect ratio (b). Number of spots and aspect ratio are the inversely related to spot size and roundness (the variables used when describing coat pattern phenotypic groups), respectively. Black lines are model estimates, grey lines are 95% confidence intervals.

**Table 1.** Summary statistics for mother-offspring regressions of spot traits of Masai giraffes in northern Tanzania. Mean trait values, SD (standard deviation), CV (among-individuals coefficient of variation), Reliability (mean % variation in measurements from different pictures of the same individual), PO slope coefficients (represents one-half of total heritability), F-statistics, and P values are provided. Statistically significant heritable traits are in bold.

|                                | Number | Area | Perimeter | Angle | Circularity   | Maximum<br>Caliper | Feret<br>Angle | Aspect<br>Ratio | Roundness | Solidity      | Mode<br>Shade | PCA 1 <sup>st</sup><br>Dimension |
|--------------------------------|--------|------|-----------|-------|---------------|--------------------|----------------|-----------------|-----------|---------------|---------------|----------------------------------|
| Mean                           | 18.9   | 0.04 | 0.99      | 87.96 | 0.51          | 0.29               | 88.2           | 1.69            | 0.63      | 0.84          | 6924050       |                                  |
| SD                             | 7.5    | 0.01 | 0.25      | 15.39 | 0.08          | 0.06               | 14.5           | 0.15            | 0.04      | 0.04          | 3930565       |                                  |
| CV                             | 0.40   | 0.39 | 0.25      | 0.17  | 0.15          | 0.19               | 0.16           | 0.09            | 0.06      | 0.05          | 0.57          |                                  |
| Reliability                    | 11     | 11   | 13        | 4     | 9             | 8                  | 7              | 5               | 3         | 2             | 13            |                                  |
| PO Slope Coefficient ( $h^2$ ) | 0.20   | 0.20 | 0.27      | 0.04  | <b>0.52</b>   | 0.21               | -0.15          | 0.19            | 0.08      | <b>0.53</b>   | 0.44          | 0.39                             |
| PO Coefficient SE              | 0.23   | 0.21 | 0.18      | 0.20  | <b>0.16</b>   | 0.21               | 0.15           | 0.18            | 0.17      | <b>0.17</b>   | 0.22          | 0.21                             |
| F <sub>1,29</sub>              | 0.76   | 0.87 | 2.27      | 0.04  | <b>9.97</b>   | 1.01               | 0.91           | 1.11            | 0.19      | <b>9.73</b>   | 4.16          | 3.45                             |
| P value                        | 0.39   | 0.36 | 0.14      | 0.84  | <b>0.0037</b> | 0.32               | 0.35           | 0.30            | 0.66      | <b>0.0041</b> | 0.05          | 0.07                             |

624 **Table 2.** Model selection results for giraffe calf survival according to phenotypic groups  
 625 defined by spot traits. Model weights indicated some evidence for group effects on survival.  
 626 Model structure in all cases was  $\{S(A \dots) g''(A) g'(A) p(t) c(t)\}$ . Minimum AICc = 3236.38,  
 627  $W = \text{AICc weight}$ ,  $k = \text{number of parameters}$ .

| Model                  | $\Delta\text{AICc}$ | W    | k  |
|------------------------|---------------------|------|----|
| A + 3 groups           | 0                   | 0.43 | 36 |
| Null (no group effect) | 0.94                | 0.27 | 34 |
| A + 4 groups           | 2.06                | 0.15 | 37 |
| A $\times$ 4 groups    | 3.01                | 0.09 | 40 |
| A $\times$ 3 groups    | 3.91                | 0.06 | 38 |

628

629

630

631 **Table 3.** Model selection results for giraffe calf survival as a linear or quadratic function of  
 632 spot trait covariates during the first season (4 months), first year, and first 3 years of life. Two  
 633 covariate beta coefficient confidence intervals excluded zero (number of spots, and aspect  
 634 ratio), indicating evidence for significant spot trait effects on calf survival during the first  
 635 season of life. Model structure in all cases was  $\{S(A + \text{Covariate}) g''(A) g'(A) p(t) c(t)\}$  with  
 636 covariate structure in survival. Minimum AICc = 3239.87, W = AICc weight, k = number of  
 637 parameters. Models comprising the top 50% cumulative W are shown.

| Model                                 | $\Delta\text{AICc}$ | W     | k  |
|---------------------------------------|---------------------|-------|----|
| Number of spots, 1st season           | 0                   | 0.048 | 33 |
| Aspect ratio, 1st season              | 0.44                | 0.039 | 33 |
| Roundness <sup>2</sup> , 1st 3 years  | 0.82                | 0.032 | 33 |
| Angle <sup>2</sup> , 1st season       | 0.87                | 0.031 | 34 |
| Roundness, 1st season                 | 0.95                | 0.030 | 33 |
| Solidity, 1st season                  | 1.06                | 0.029 | 33 |
| Area <sup>2</sup> , 1st season        | 1.11                | 0.028 | 33 |
| Circularity, 1st season               | 1.15                | 0.027 | 33 |
| Angle <sup>2</sup> , 1st 3 years      | 1.21                | 0.026 | 34 |
| Null model, no covariate              | 1.22                | 0.026 | 32 |
| Maximum caliper, 1st season           | 1.30                | 0.025 | 33 |
| PCA dimension 1, 1st year             | 1.63                | 0.021 | 33 |
| Angle, 1st 3 years                    | 1.75                | 0.020 | 33 |
| Solidity <sup>2</sup> , 1st season    | 1.76                | 0.020 | 34 |
| Perimeter, 1st season                 | 1.88                | 0.019 | 33 |
| Feret angle <sup>2</sup> , 1st season | 1.88                | 0.019 | 34 |

# Giraffe coat patterns

D. E. Lee *et al.*

|                                           |      |       |    |
|-------------------------------------------|------|-------|----|
| PCA dimension 2 <sup>2</sup> , 1st year   | 1.90 | 0.019 | 34 |
| Feret angle, 1st season                   | 1.93 | 0.018 | 33 |
| Number of spots <sup>2</sup> , 1st season | 2.06 | 0.017 | 34 |

638

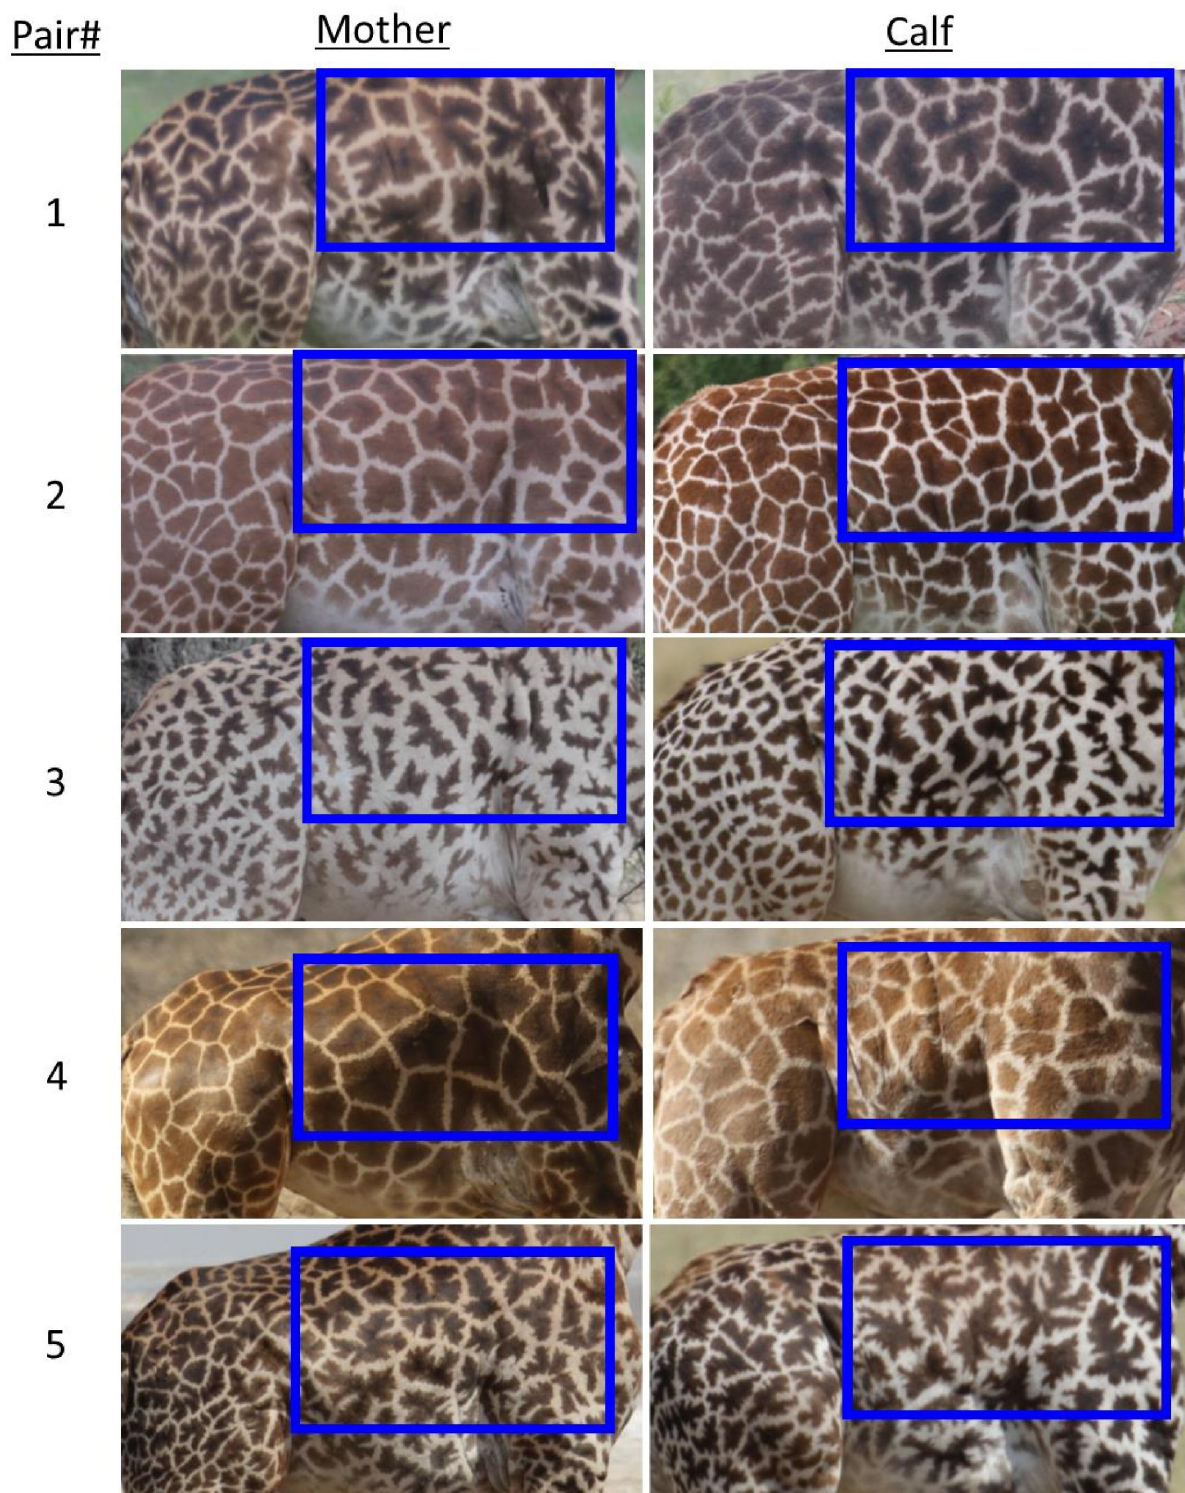



Shape

Circularity  
(0.10—0.94)

Solidity  
(0.52—0.96)

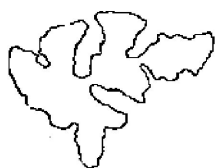

0.15

0.66

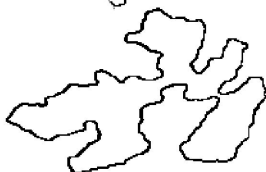

0.13

0.60

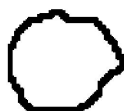

0.88

0.94

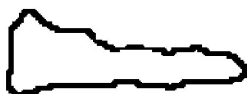

0.37

0.76

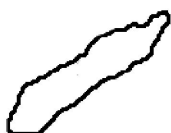

0.40

0.83

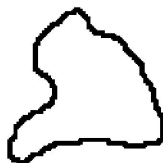

0.57

0.82

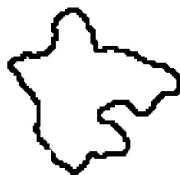

0.44

0.76

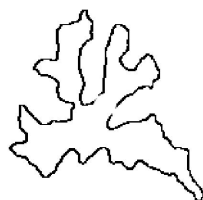

0.12

0.53

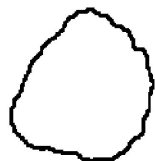

0.83

0.96





# Optimal number of clusters

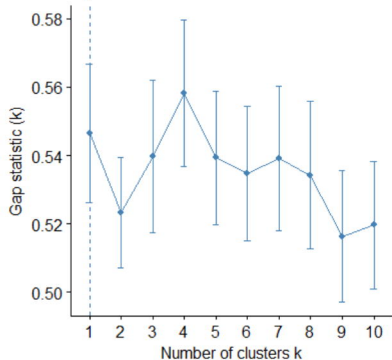

# Partitioning Clustering Plot

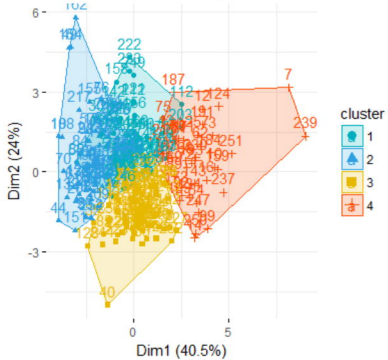

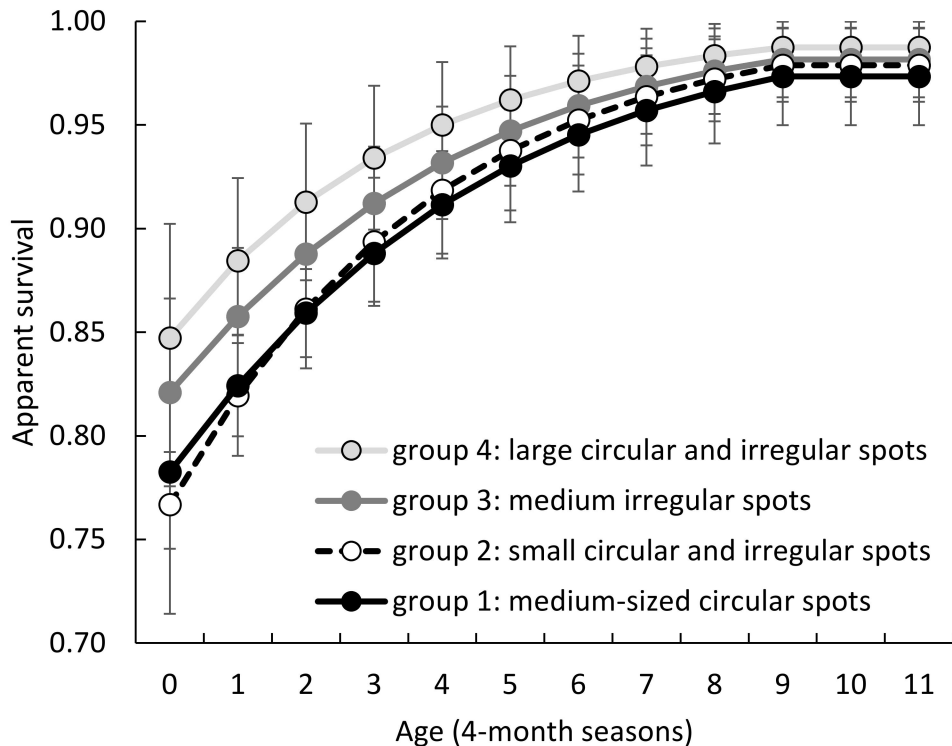

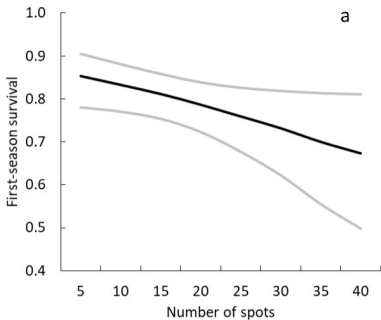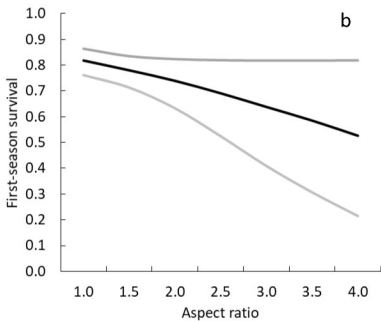

Source: http://biorxiv.org/content/10.1101/161281v3.full.pdf
